# Supplementary material
Source: publisher figshare collection journal article supplement (https://sage.figshare.com/ndownloader/files/14523296)
Supplement: Supplementary file 1 [file 14523296]

## Supplementary File for All Figures

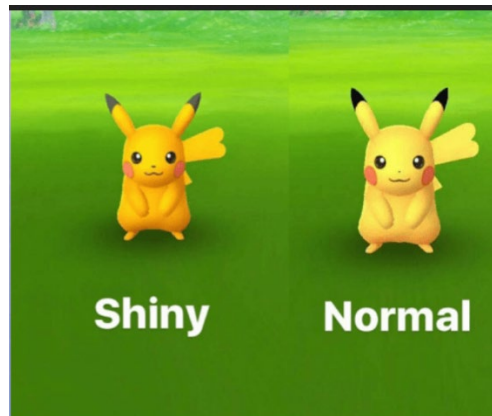

Figure 1: Shiny Pikachu is pictured on the left; whereas regular color Pikachu in *Pokémon GO* is on the right. The point in Pikachu's tail, to signal a heart shaped tail, also signifies this Pikachu is female. Screengrabbed from PokémonGoPocket.com, May 2018.

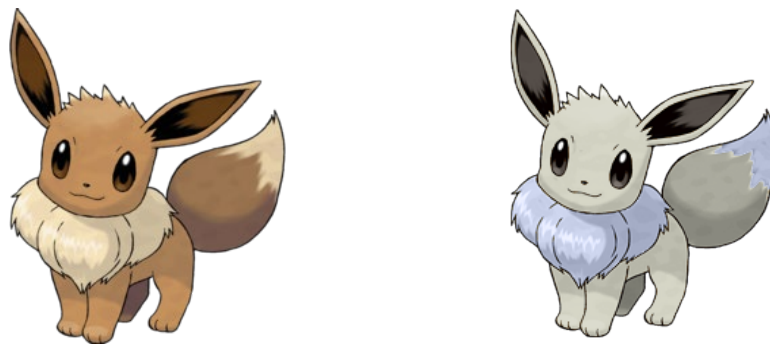

Figure 2 & 3: The Pokémon Eevee is pictured. Its shiny variant is pictured to the right and is one of the most sought after shiny Pokémon.

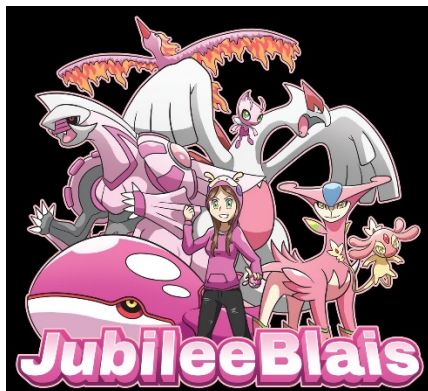

Figure 4. A picture of all Jubilee's Pink Shiny Legendary Pokémon caught on stream. Image Screengrabbed by author March 2018.

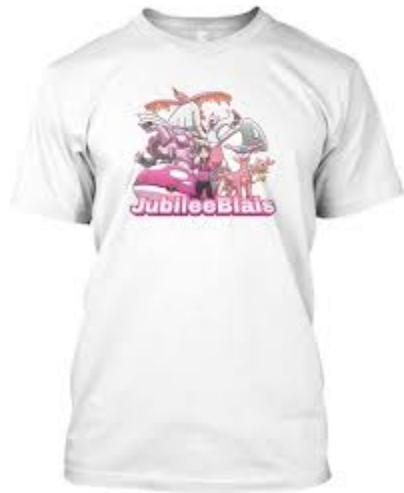

Figure 5. Shirt with Jubilee's logo on it. Was available for a limited time through teespring. Image Screengrabbed by author March 2018.

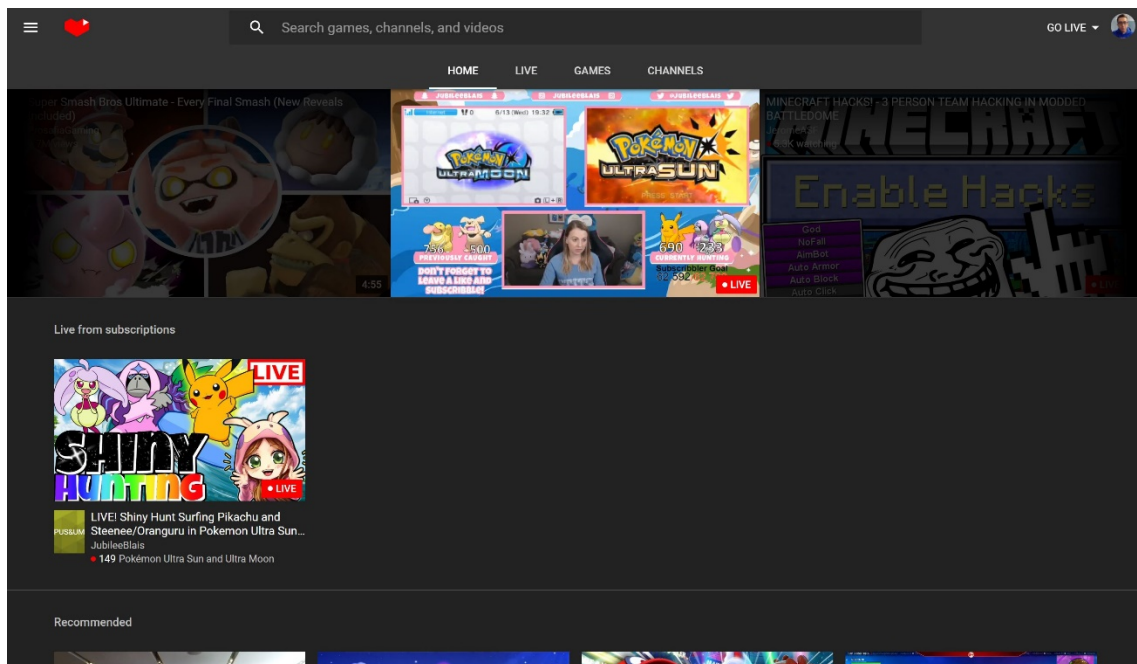

Figure 6: Who is currently Live on YouTube Gaming. Image Screengrabbed by author June 2018.

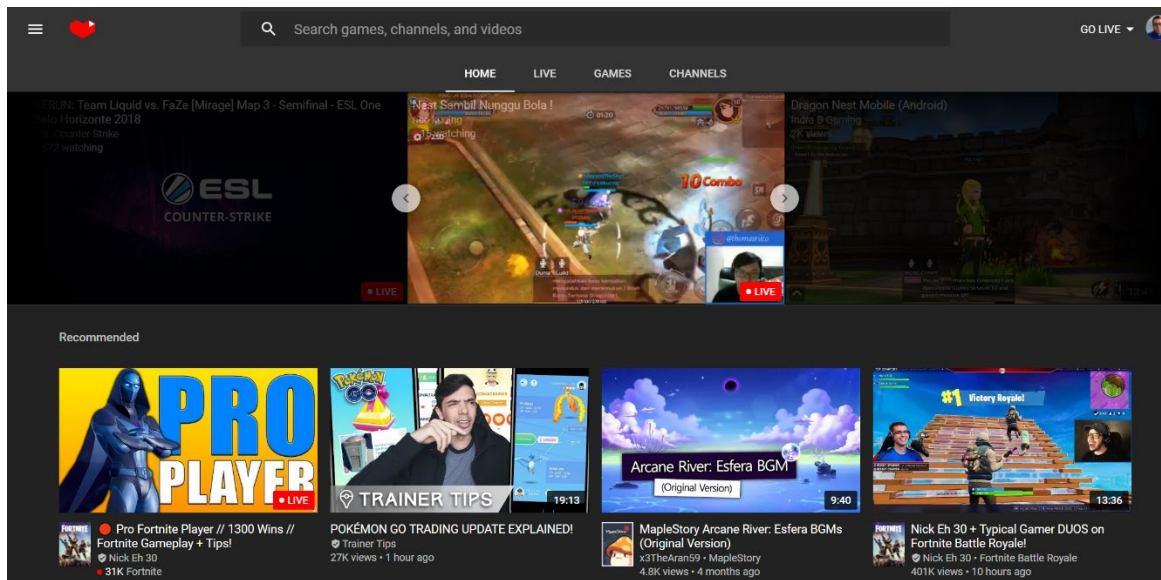

Figure 7: personalized home page on YouTube Gaming. The top is a combination of live streams and uploaded content the recommended section is based on the author's viewing history of game. Screenshot from YouTube Gaming June 2018.

| Purchase amount (USD) | Color | Color name | Max. message length | Max. time in the ticker |
|-----------------------|-------|------------|---------------------|-------------------------|
| \$ 1.00 - 1.99        |       | Blue       | 0 characters        | 0 seconds               |
| \$ 2.00 - 4.99        |       | Light blue | 50 characters       | 0 seconds               |
| \$ 5.00 - 9.99        |       | Green      | 150 characters      | 2 minutes               |
| \$ 10.00 - 19.99      |       | Yellow     | 200 characters      | 5 minutes               |
| \$ 20.00 - 49.99      |       | Orange     | 225 characters      | 10 minutes              |
| \$ 50.00 - 99.99      |       | Magenta    | 250 characters      | 30 minutes              |
| \$ 100.00 - 199.99    |       | Red        | 270 characters      | 1 hour                  |
| \$ 200.00 - 299.99    |       | Red        | 290 characters      | 2 hours                 |
| \$ 300.00 - 399.99    |       | Red        | 310 characters      | 3 hours                 |
| \$ 400.00 - 499.99    |       | Red        | 330 characters      | 4 hours                 |
| \$ 500.00             |       | Red        | 350 characters      | 5 hours                 |

**Note:** There is a sitewide daily limit of \$ 500 USD.

Purchases less than \$ 5.00 USD do not display in the ticker.

Figure 8: Super Chat colors and purchase amount. The more money one donates via Super Chat, the longer they are shown. Image taken from <https://support.google.com/youtube/answer/7277005?hl=en>

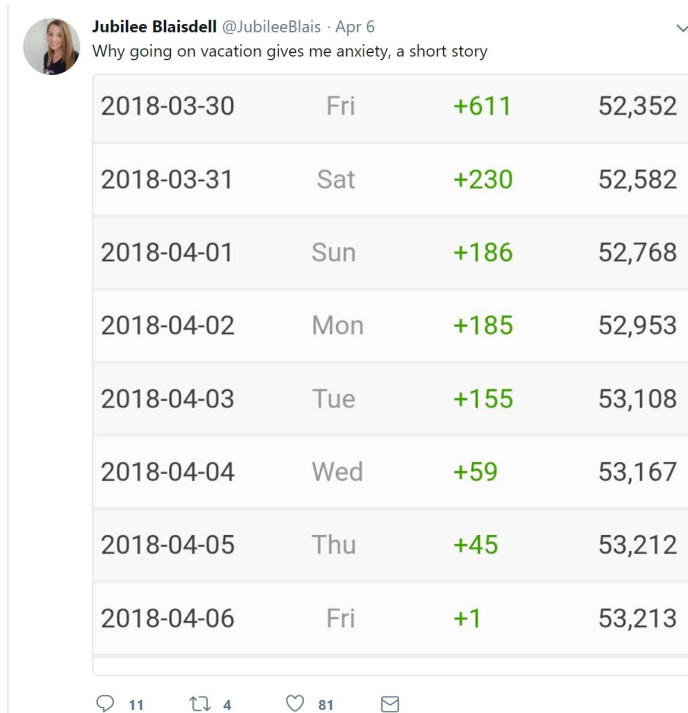

Figure 9: Tweet from @JubileeBlais expressing concern and anxiety when she went on vacation for a week and how people stopped subscribing to her channel since she wasn't doing live streams even though she uploaded pre-edited content.

**Rules:**

- Do not promote ANYONE besides me in the chat. Do not ask people to subscribe to you or anyone else besides me, do not ask people to watch any video or go to any website or anything else!
- No swearing or explicit topics (basically, if it would give a movie an R rating, don't discuss it here), this is a child friendly stream.
- If you are not a mod, do not try to be a mod. If you see someone breaking the rules, let the mods handle it. If the mods miss it, it doesn't matter.
- Do not harass or belittle anyone for any reason.
- ANY negative speech about ANYONE based on race, religion, sexual orientation, etc. will NOT BE TOLERATED.
- Do not spoil any tv show, video game, book, movie, or anything else.
- Do not talk in complete gibberish
- HAVE FUN!!!

**Punishments:**

- If you break a rule, you will be timed out for 300 seconds. Mods are not required to tell you why you were timed out (and you can get timed out by nightbot, who is literally a robot and will never tell you anything)
- Mods reserve the right to ban ANYONE for ANY reason. They are not required to give you a reason why they banned you and I will back them up 100%.
- Mods are there to make the chat a friendly, fun place for all. If you are making the chat a non-friendly unfun place to be, you will be banned.
- Extreme offenses automatically result in a ban. I.e. saying anything explicit or harassing anyone.

Figure 10: Rules and punishments for Jubilee's streams.

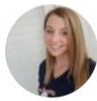

**Jubilee Blaisdell** @JubileeBlais · Mar 24

This person kept spamming that poipole is shiny locked on stream and then left this comment 🙄😂 judging by this comment you can clearly see how "professional" and "polite" they are lmao

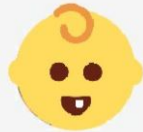

It would appear that i was right. Even after so rudely being blocked. I was being professional and polite. I said that cerebi has been known to be wrong and the people ive encountered to have had a shiny poipole was hacked in. You had no business blocking me and because of that, both you, Jubilee and Mike have lost a sub. How dumb do you feel now?

• 3 hours ago (edited)

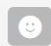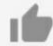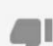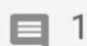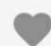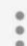

50

10

154

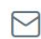

Figure 11: One of many people who were upset with Jubilee for not giving them attention and then blocking them for spamming.

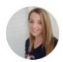

**Jubilee Blaisdell**  
@JubileeBlais

Following

Teaching children the important things in life

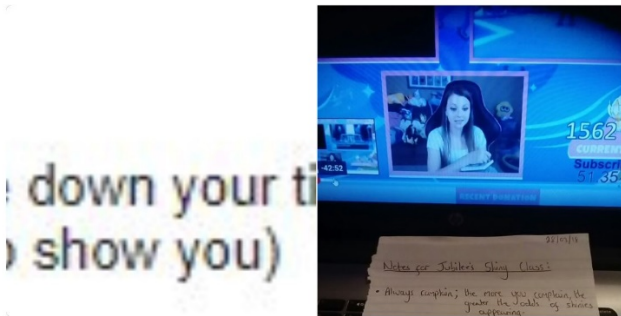

10:22 AM - 31 Mar 2018

12 Retweets 118 Likes

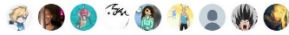

7 12 118

Good evening Jubilee,

You advised us to take out a notepad and write down your tips for shiny hunting so I thought I'd let you see that I've been a good student. (I've attached a picture to show you)

7 12 118

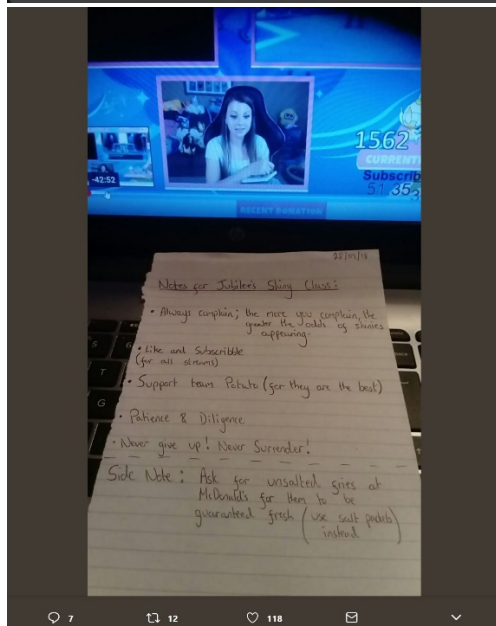

Figures 12, 13, 14: Jubilee tweets about how one viewer messaged her with their notes about shiny hunting and ordering fries at McDonalds.



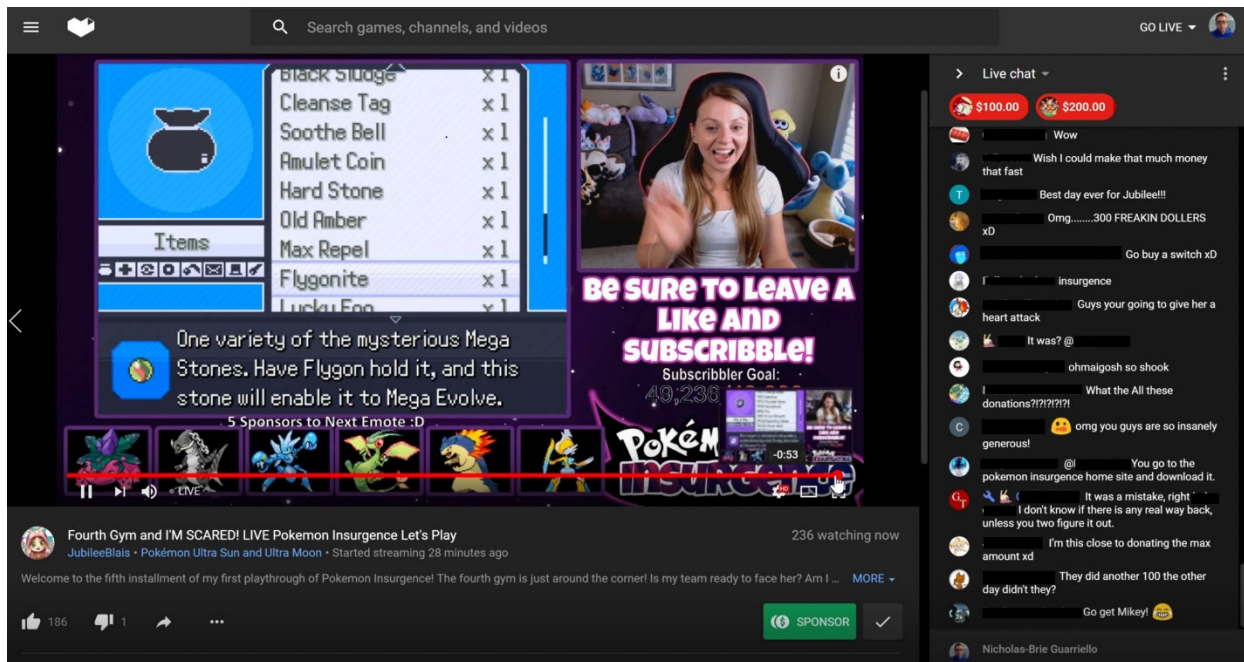

Figure 15: Jubilee expressing how happy she is after receiving 300 dollars in Super Chats within the first 30 minutes of one of her live streams. It was found out the person made a mistake and meant to donate 20 dollars, but refunds or chargebacks are seldom issued for YouTube Super Chats. *Username redacted by author.*

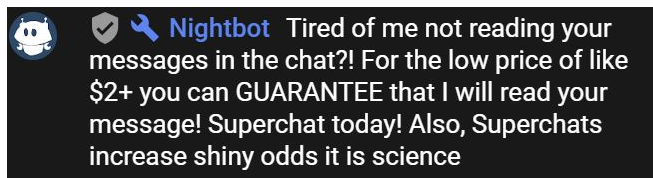

Figure 16: bot talking on behalf of Jubilee about Super Chats. Screengrabbed from JubileeBlais live stream April 2018.

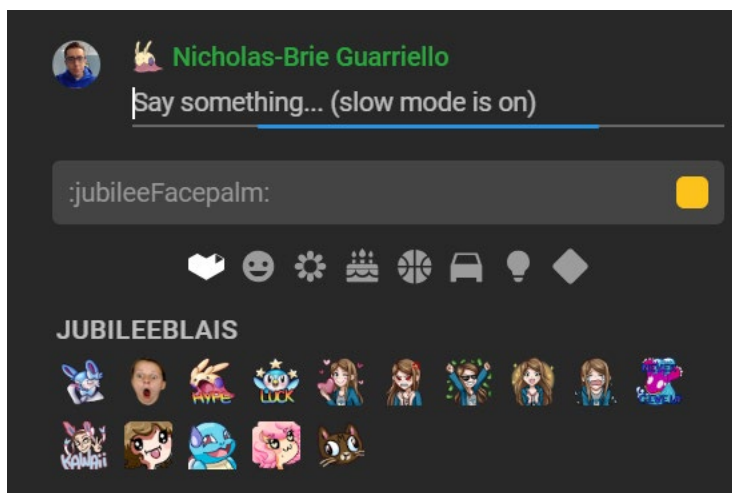

Figure 17: Custom emotes, green username, and an icon next to their name just for Sponsors.

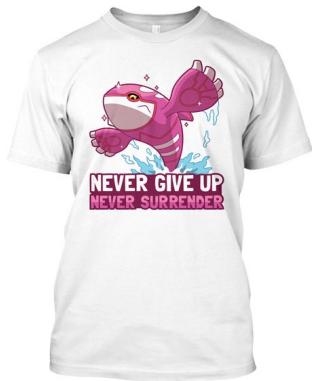

Figure 18: Shiny Kyogre Teespring shirt w/ Jubilee's catch-phrase "Never Give Up, Never Surrender."

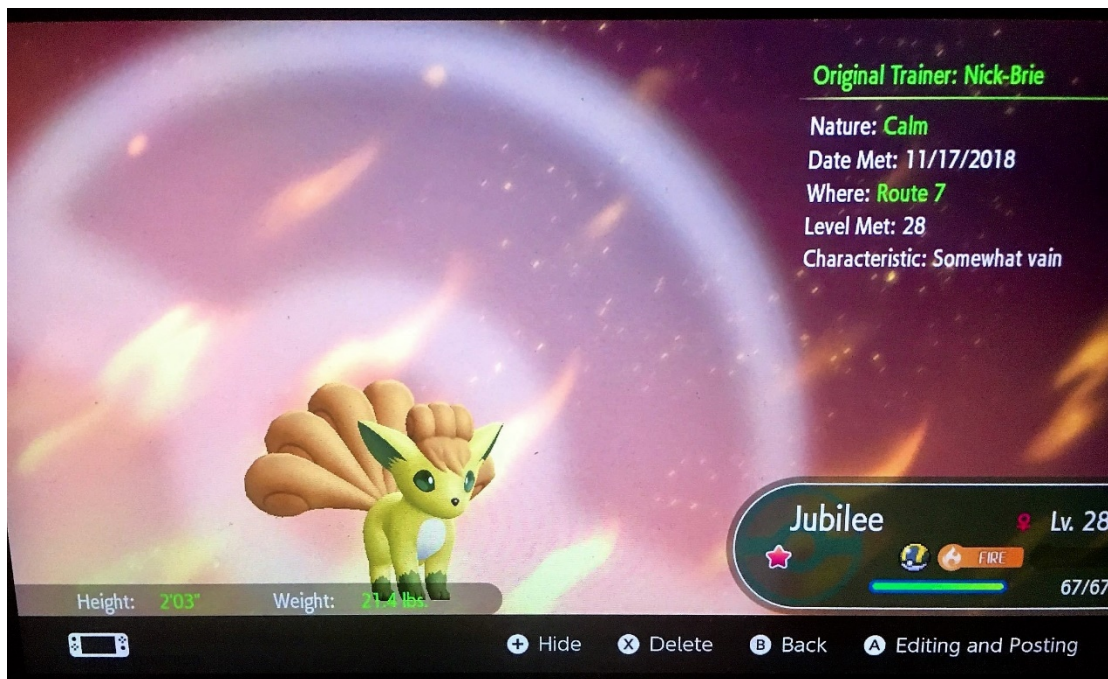

Figure 19: Shiny Vulpix is pictured above as of November 2018. It is named after Jubilee in honor of the author's first shiny hunted Pokémon.



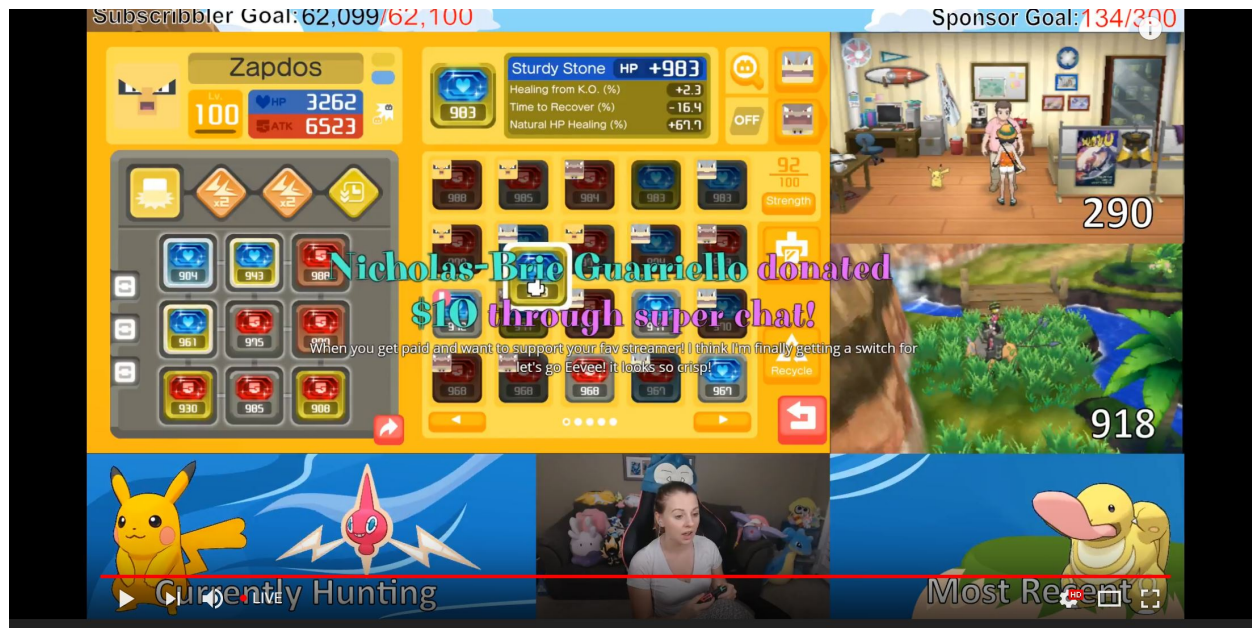

Figure 20: A screengrab from June 2018 by the author who Super Chats Jubilee after getting paid from work. This shows the updated style of Jubilee's Super Chat (following that of Twitch). Now every Super Chat will appear on the screen and on top of the live chat.
